# Supplementary material
Source: publisher figshare collection journal article supplement (https://sage.figshare.com/ndownloader/files/15253715)
Supplement: Supplementary file 1 [file 15253715]

Supplemental Appendix for

## **Bioprinting of 3D dentin-pulp complex with local differentiation of hDPSCs**

Jonghyeuk Han<sup>1</sup>, Da Sol Kim<sup>2</sup>, Il Ho Jang<sup>2,3</sup>, Hyung-Ryong Kim<sup>4,†</sup>, and Hyun-Wook Kang<sup>1,†</sup>

<sup>1</sup>*School of life sciences, Ulsan National Institute of Science and Technology, 50, UNIST-gil, Ulsu-gun 44919, Ulsan, South Korea.*

<sup>2</sup>*Department of Oral Biochemistry, <sup>3</sup>Institute of Translational Dental Sciences, Pusan National University School of Dentistry, 49 Busandaehak-ro, Mulgeum-eup, Yangsan-si, Gyeongsangnam-do, 50612, South Korea*

<sup>4</sup>*Graduate School, Daegu Gyeongbuk Institute of Science and Technology, 333 Techno Jungang-daero, Hyeonpung-myeon, Dalseong-gun, Daegu, 42988, South Korea*

<sup>†</sup> *Corresponding author  
Hyun-Wook Kang, Ph.D.*

*Biomedical Engineering, School of Life Sciences, UNIST  
50, UNIST-gil, Ulsan 44919, South Korea  
Tel.: +82 52 217 2527; E-mail address: [hkang@unist.ac.kr](mailto:hkang@unist.ac.kr)*

*Hyung-Ryong Kim, Ph.D. D.D.S.  
Graduate School, DGIST  
333 Techno Jungang-daero, Hyeonpung-myeon, Dalseong-gun, Daegu, 42988, Korea  
Tel.: +82 53 785 2601; E-mail address: [hkim@dgist.ac.kr](mailto:hkim@dgist.ac.kr)*

**Appendix Table 1.** Genes and their primer sequences for RT-qPCR

| Genes | Primer Sequences  |                            |
|-------|-------------------|----------------------------|
| GAPDH | Forward (5' → 3') | GAA-GGT-GAA-GGT-CGG-AGT    |
|       | Reverse (3' → 5') | GAA-GAT-GGT-GAT-GGG-ATT-TC |
| DMP-1 | Forward (5' → 3') | CAA-GAC-AGT-GCC-CAA-GAT-AC |
|       | Reverse (3' → 5') | TTC-CCT-CAT-CGT-CCA-ACT    |
| DSPP  | Forward (5' → 3') | CTG-GTG-CAT-GAA-GGT-GAT-AG |
|       | Reverse (3' → 5') | CCC-TCT-TCG-TTT-GCT-AAT-GT |

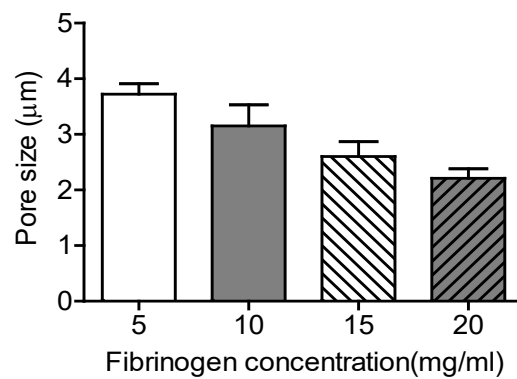

**Appendix Figure 1.** Pore size of crosslinked bio-ink with four different concentrations of fibrinogen (n=24).

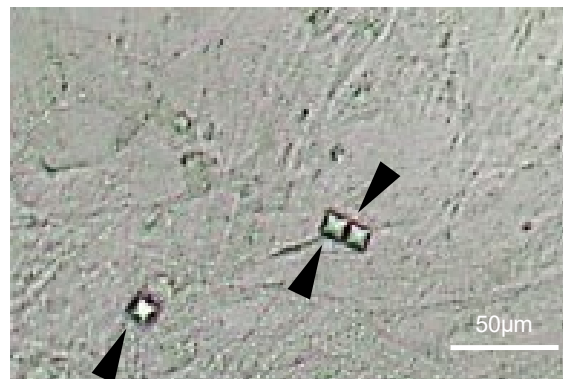

**Appendix Figure 2.** Optical microscopy image showing Ca-phosphate crystals deposited by hDPSC after differentiation for 15 days.
